# Supplementary material for: Synthesis, Molecular Recognition Study and Liquid Membrane-Based Applications of Highly Lipophilic Enantiopure Acridino-Crown Ethers
Source: PubMed Central journal article supplement (PMC7321232; doi:10.3390/molecules25112571), 2020-05-31
Supplement: molecules-25-02571-s001.pdf [file molecules-25-02571-s001.pdf]

# SUPPORTING INFORMATION

## Synthesis, molecular recognition study and liquid membrane-based applications of highly lipophilic enantiopure acridino-crown ethers

Ádám Golcs <sup>1,\*</sup>, Bálint Árpád Ádám <sup>1</sup>, Viola Horváth <sup>2</sup>, Tünde Tóth <sup>1,3</sup>, Péter Huszthy <sup>1</sup>

<sup>1</sup> Department of Organic Chemistry and Technology, Budapest University of Technology and Economics, Szent Gellért tér 4., H-1111 Budapest, Hungary

<sup>2</sup> MTA-BME Computation Driven Chemistry Research Group, Szent Gellért tér 4., H-1521 Budapest, Hungary

<sup>3</sup> Institute for Energy Security and Environmental Safety, Centre for Energy Research, Konkoly-Thege Miklós út 29-33., H-1121 Budapest, Hungary

\* Correspondence: golcs.adam@gmail.com

### Contents

1. <sup>1</sup>H-NMR and <sup>13</sup>C-NMR spectra of the key intermediates used for preparation of new compounds (solvent: CDCl<sub>3</sub>)
2. <sup>1</sup>H-NMR and <sup>13</sup>C-NMR spectra of the new compounds (solvent: CDCl<sub>3</sub>)
3. Determination of enantiomeric purity of macrocycles by chiral HPLC
4. UV calibration curves for determining the transported amounts of various amine derivatives
5. Spectrophotometric determination of complex stability constants (log*K* values) of the reported enantiopure macrocycles (*R,R*)-**2** and (*S,S*)-**2** with the enantiomers of various chiral protonated amine derivatives
6. Electrochemical calibration curves and potentiometric selectivity measurements of ion-selective membrane electrode containing (*R,R*)-**2** as an ionophore

1.  $^1\text{H-NMR}$  and  $^{13}\text{C-NMR}$  spectra of the key intermediates used for preparation of new compounds (solvent:  $\text{CDCl}_3$ )

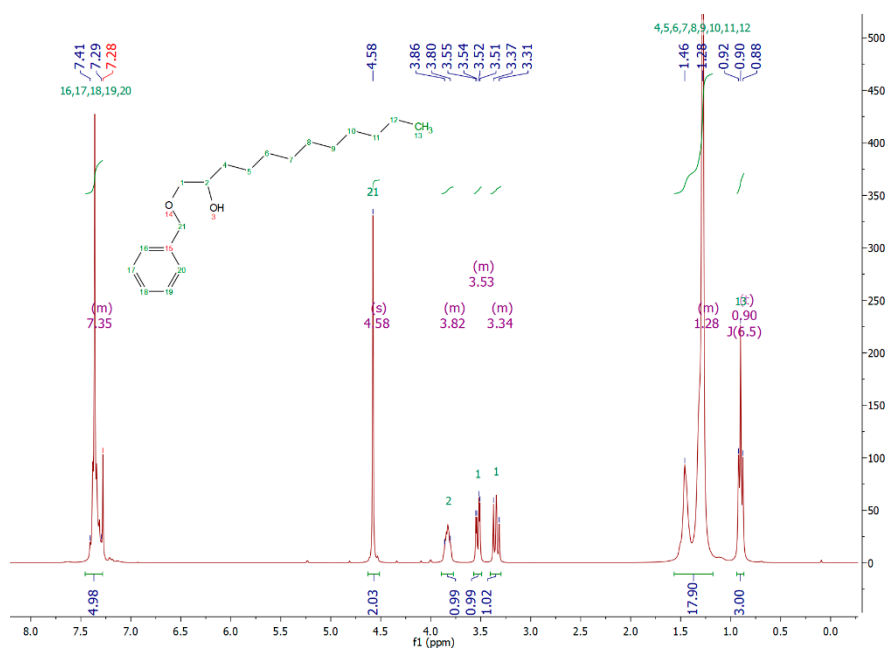

Figure S1.  $^1\text{H-NMR}$  spectrum of intermediates (*R*)-3 and (*S*)-3

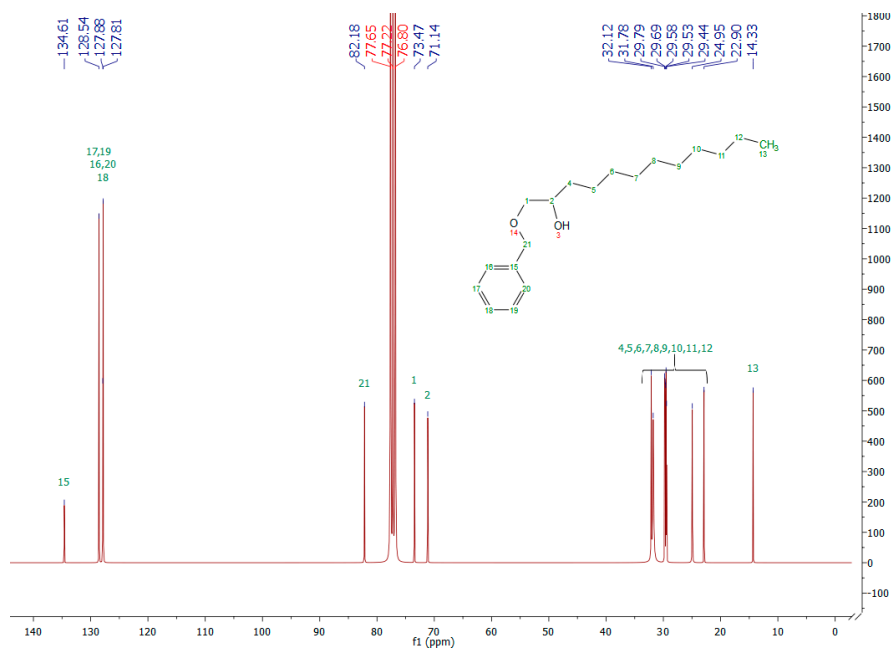

Figure S2.  $^{13}\text{C-NMR}$  spectrum of intermediates (*R*)-3 and (*S*)-3

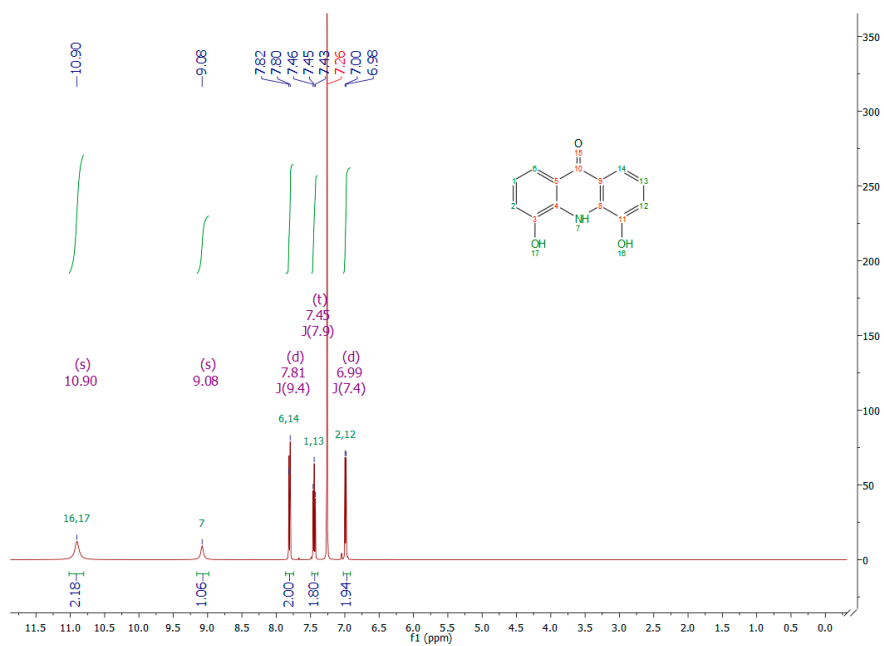

Figure S3. <sup>1</sup>H-NMR spectrum of intermediate 5

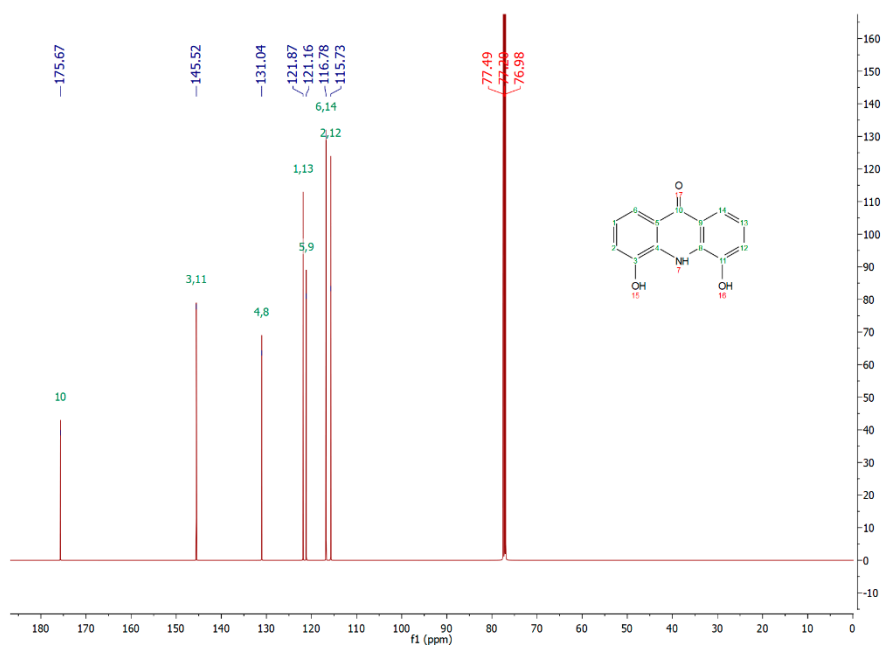

Figure S4. <sup>13</sup>C-NMR spectrum of intermediate 5

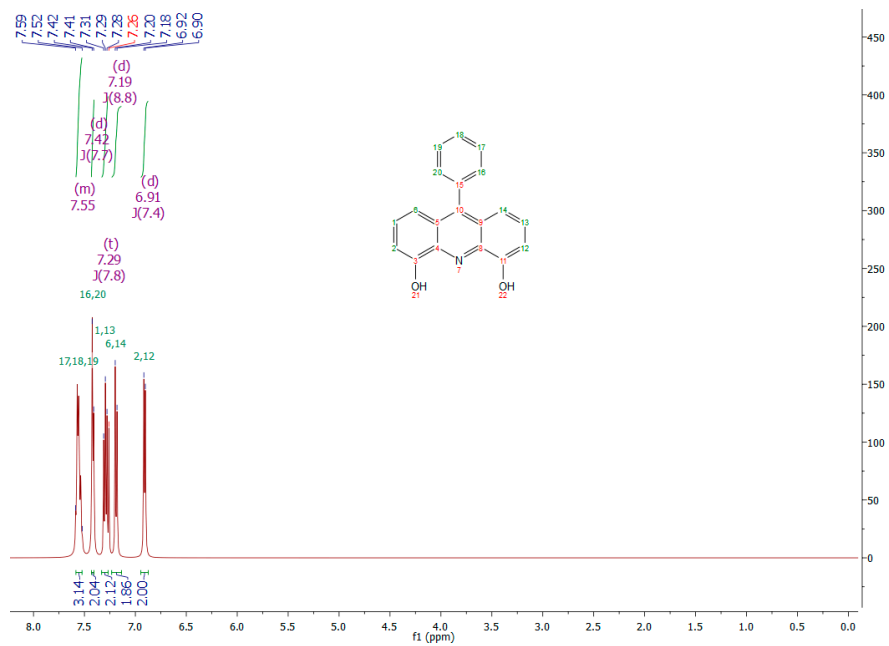

Figure S5. <sup>1</sup>H-NMR spectrum of intermediate 9 (after shaking with D<sub>2</sub>O)

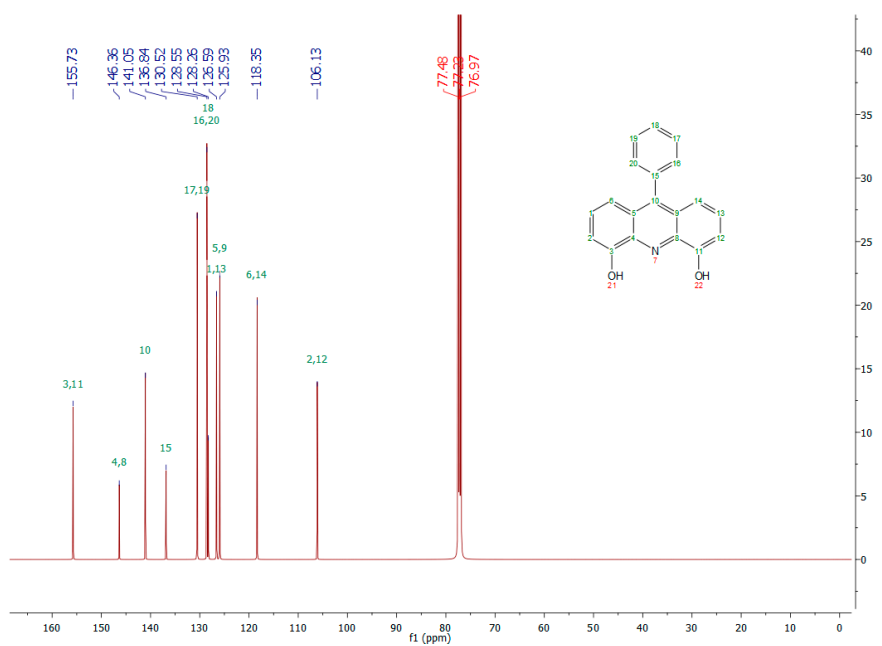

Figure S6. <sup>13</sup>C-NMR spectrum of intermediate 9

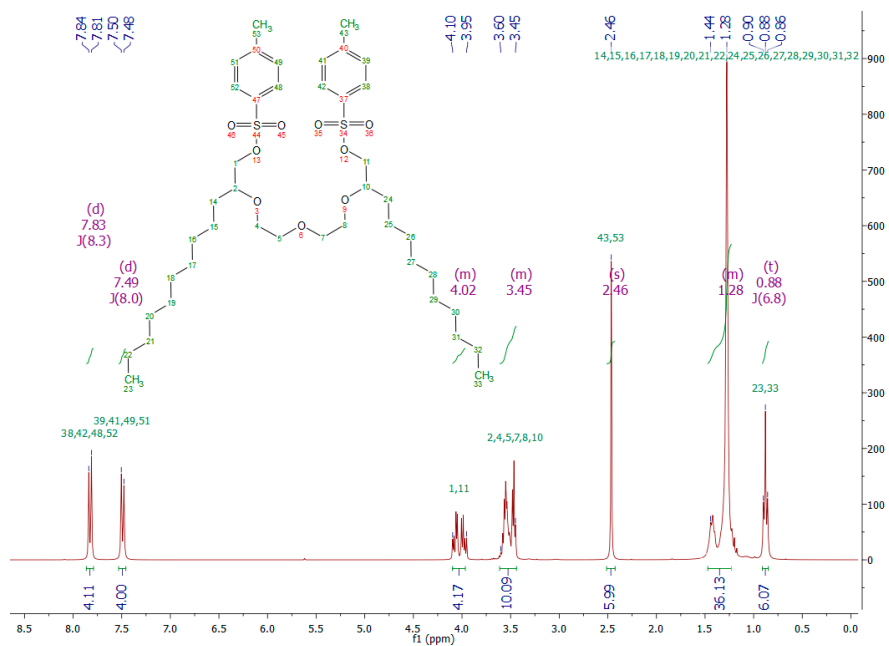

**Figure S7. <sup>1</sup>H-NMR spectrum of intermediates (*R,R*)-10 and (*S,S*)-10**

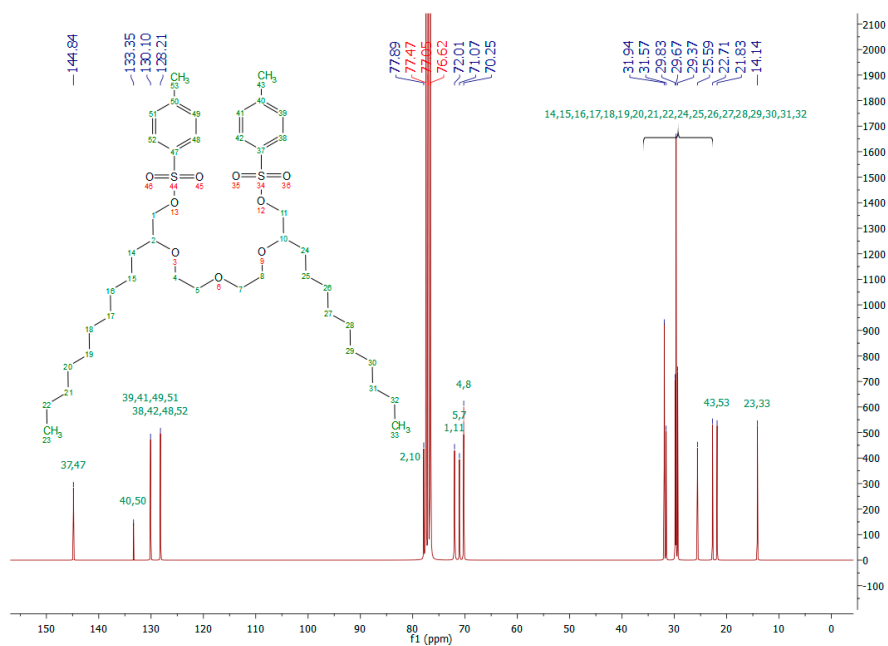

**Figure S8. <sup>13</sup>C-NMR spectrum of intermediates (*R,R*)-10 and (*S,S*)-10**

2.  $^1\text{H-NMR}$  and  $^{13}\text{C-NMR}$  spectra of the new compounds (solvent:  $\text{CDCl}_3$ )

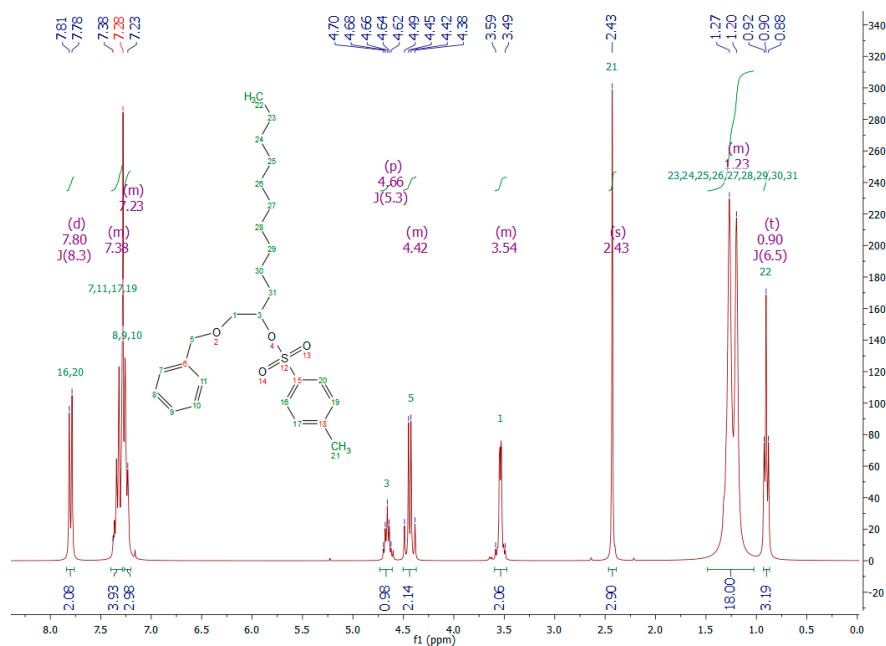

Figure S9.  $^1\text{H-NMR}$  spectrum of compounds (R)-4 and (S)-4

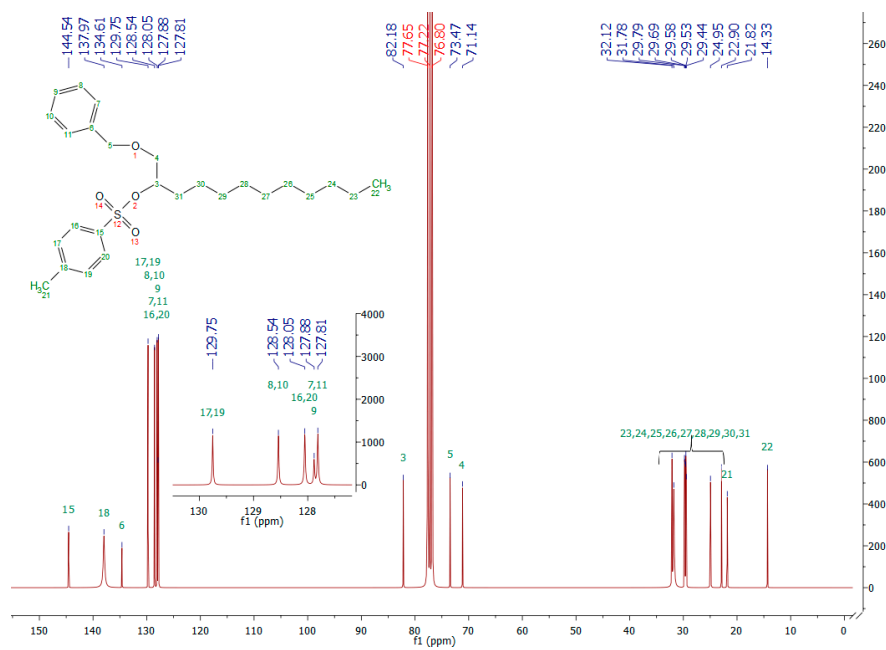

Figure S10.  $^{13}\text{C-NMR}$  spectrum of compounds (R)-4 and (S)-4

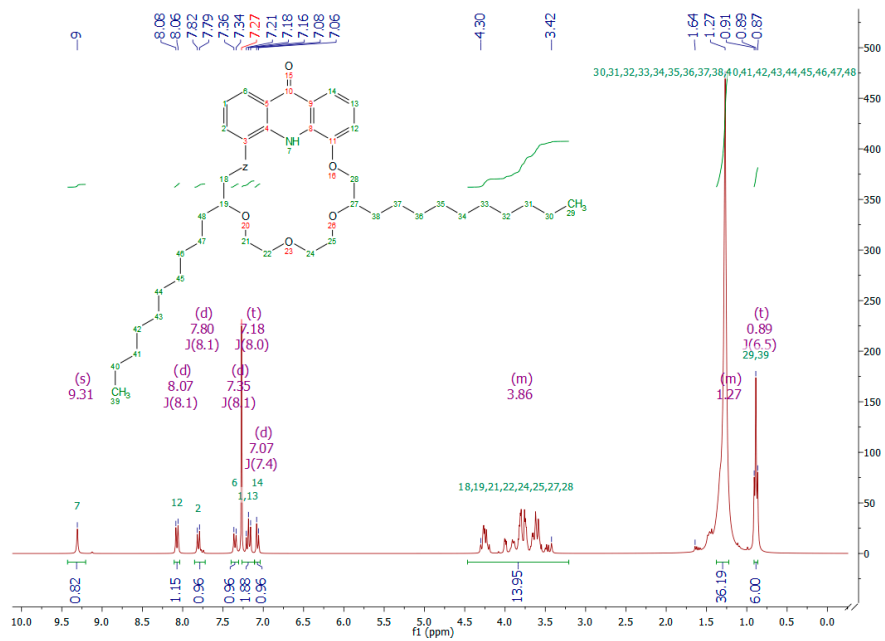

**Figure S11.** <sup>1</sup>H-NMR spectrum of macrocycles (*R,R*)-1 and (*S,S*)-1

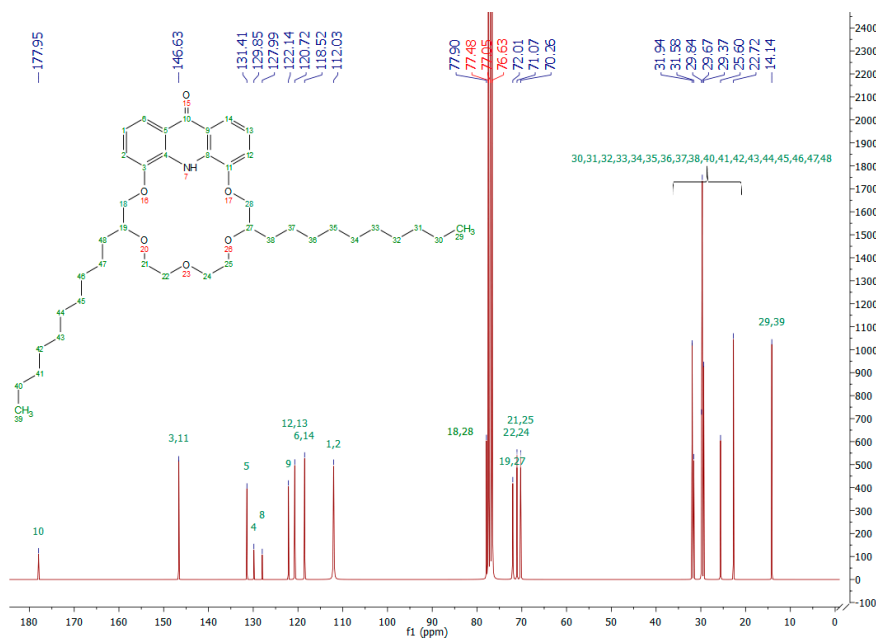

**Figure S12.** <sup>13</sup>C-NMR spectrum of macrocycles (*R,R*)-1 and (*S,S*)-1

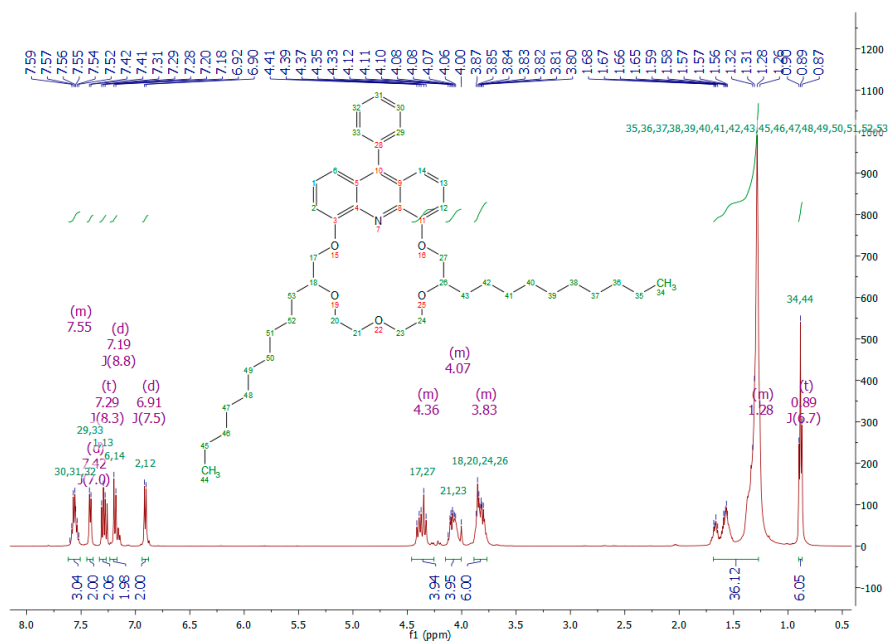

Figure S13.  $^1\text{H-NMR}$  spectrum of macrocycles (*R,R*)-2 and (*S,S*)-2

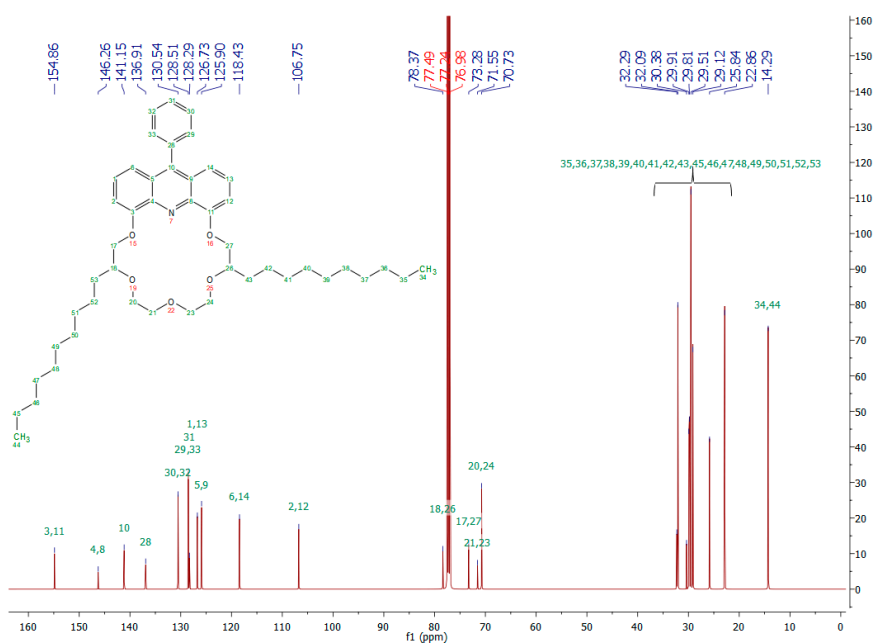

Figure S14.  $^{13}\text{C-NMR}$  spectrum of macrocycles (*R,R*)-2 and (*S,S*)-2



### 3. Determination of enantiomeric purity of macrocycles by chiral HPLC

Chiral chromatography was performed on a VWR Hitachi Elite (Hitachi Ltd., Japan) HPLC system, involving a Diode Array Detector L-2450, a LaChrom L-2310 pump, an L-2200 autosampler, and an L-2300 column oven, using a Reprisil Chiral MIA HPLC column (100 x 4,6 mm). Isocratic elution was applied with solvent system of 1:9 mixture of isopropyl alcohol/CH<sub>3</sub>CN + 0.1 % trifluoroacetic acid and applying a flow rate of 0.4 mL/min at 20 °C. UV absorbance detection was carried out at 280 nm.

In case of crown ethers (*R,R*)-1 and (*S,S*)-1 a mixture containing both of the enantiomers with an enantiomeric ratio of (*R,R*):(*S,S*) = 1:2 was measured. Retention times: 9.14 min for (*R*)-enantiomer and 7.96 min for (*S*)-enantiomer. Enantiomeric purity was calculated from the ratios of the areas of chromatographic peaks and found to be > 97 %.

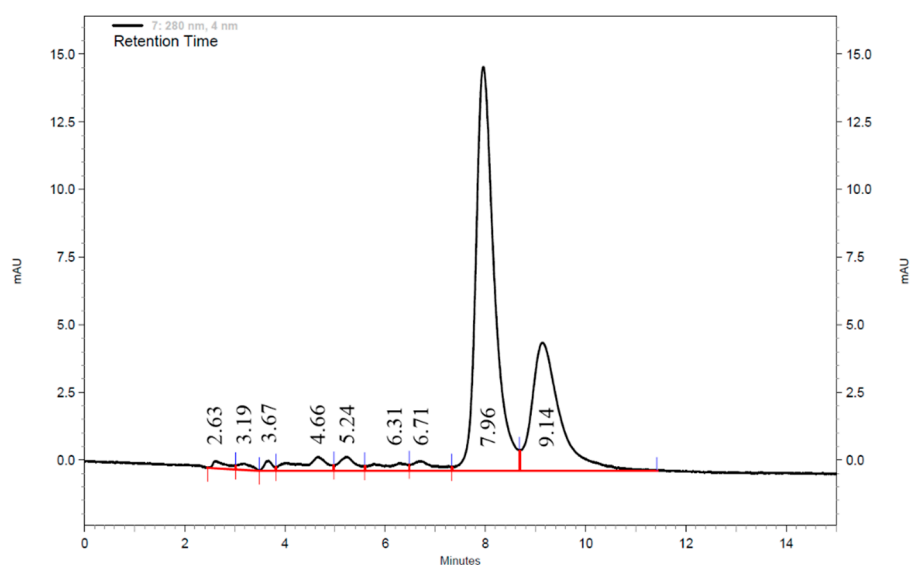

| Peak   | Retention Time | Area Percent | Capacity factor | Resolution (USP) | Asymmetry |
|--------|----------------|--------------|-----------------|------------------|-----------|
| 1      | 2.63           | 0.82         | 0.53            | 0.00             | 0.00      |
| 2      | 3.19           | 0.69         | 0.86            | 0.00             | 0.00      |
| 3      | 3.67           | 0.66         | 1.14            | 0.00             | 0.00      |
| 4      | 4.66           | 3.06         | 1.71            | 1.86             | 0.00      |
| 5      | 5.24           | 1.86         | 2.05            | 0.85             | 0.00      |
| 6      | 6.31           | 1.81         | 2.68            | 1.44             | 0.00      |
| 7      | 6.71           | 1.80         | 2.91            | 0.48             | 0.00      |
| 8      | 7.96           | 60.09        | 3.64            | 1.73             | 0.00      |
| 9      | 9.14           | 29.21        | 4.32            | 1.50             | 0.00      |
| Totals |                | 100.00       |                 |                  |           |

**Figure S15.** Chromatogram for macrocycles (*R,R*)-1 and (*S,S*)-1

In case of crown ethers (*R,R*)-2 and (*S,S*)-2 a mixture containing both of the enantiomers with an enantiomeric ratio of (*R,R*):(*S,S*) = 1:2 was measured. Retention times: 9.62 min for (*R*)-enantiomer and 8.43 min for (*S*)-enantiomer. Enantiomeric purity was calculated from the ratios of the areas of chromatographic peaks and found to be > 98 %.

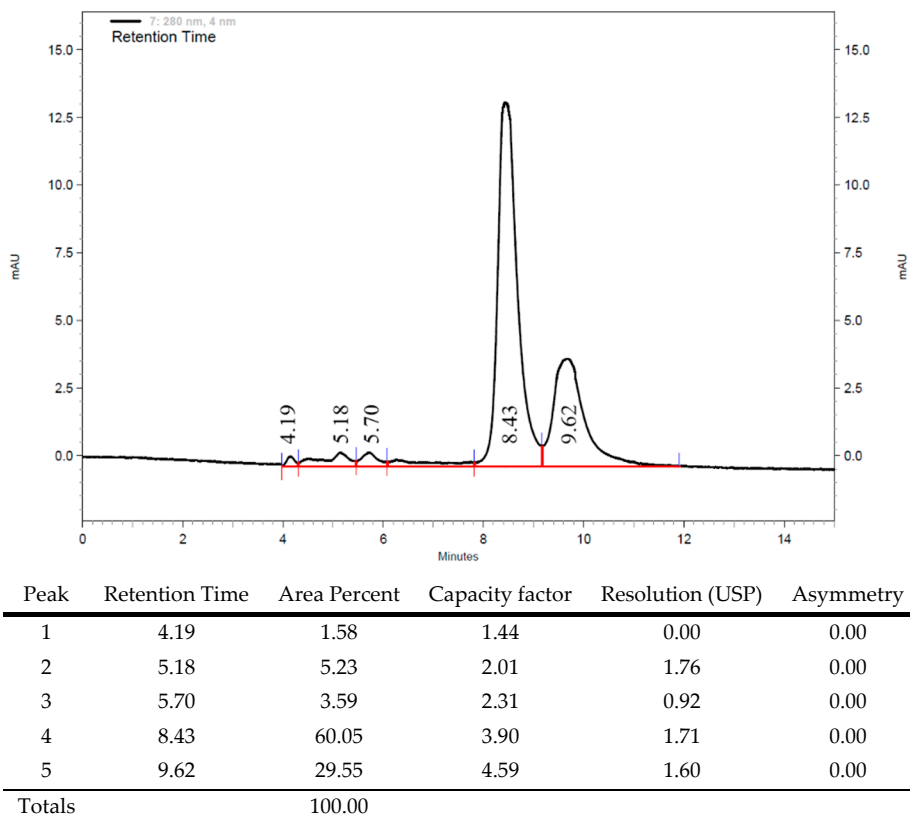

**Figure S16.** Chromatogram for macrocycles (*R,R*)-2 and (*S,S*)-2

4. UV calibration curves for determining the transported amounts of various amine derivatives

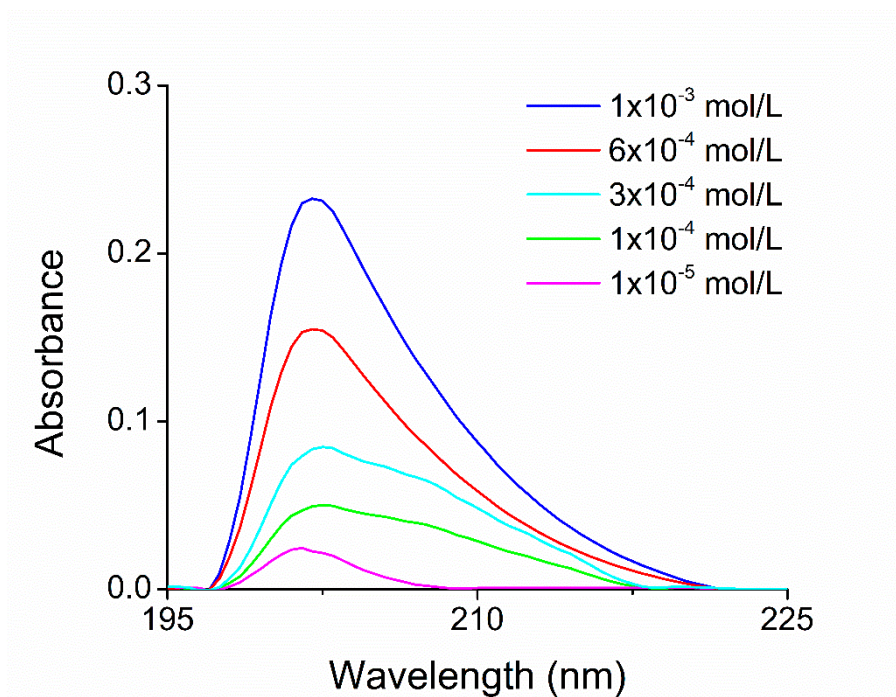

Figure S17. UV-absorption spectrum of amine derivative 12

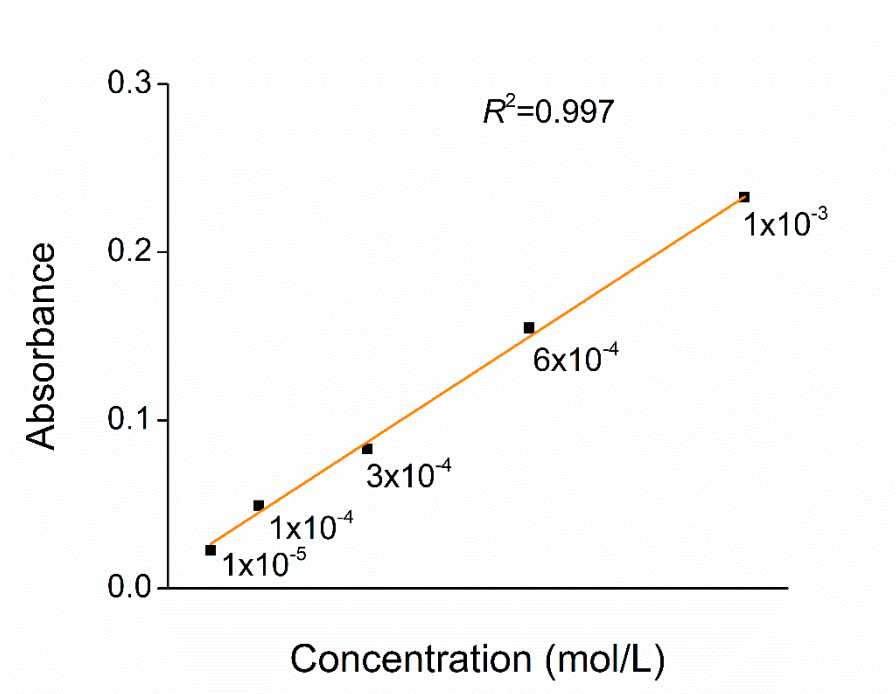

Figure S18. UV-absorption calibration curve for amine derivative 12 at the excitation wavelength of 202 nm

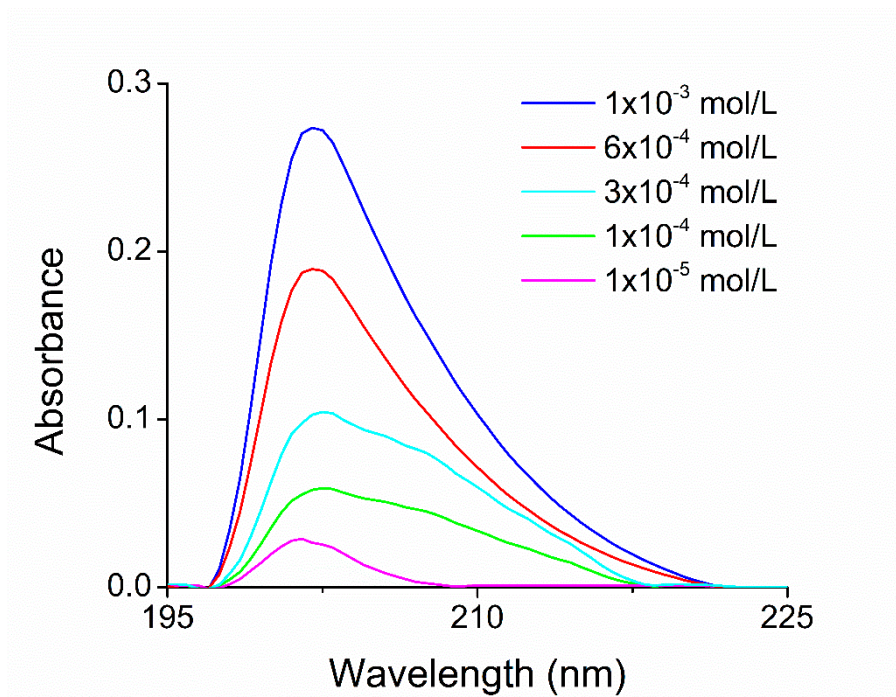

Figure S19. UV-absorption spectrum of amine derivative 13

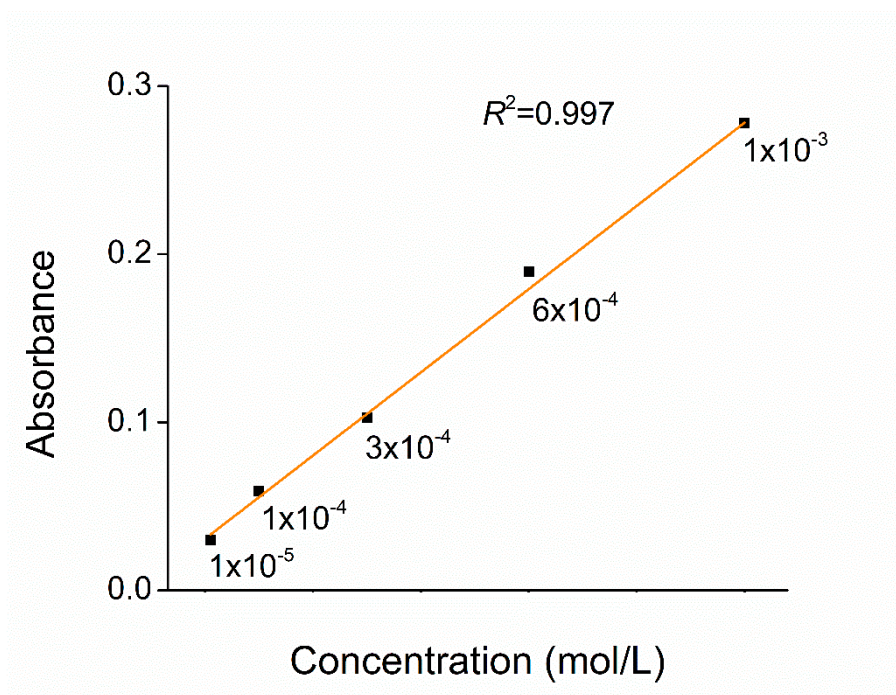

Figure S20. UV-absorption calibration curve for amine derivative 13 at the excitation wavelength of 202 nm



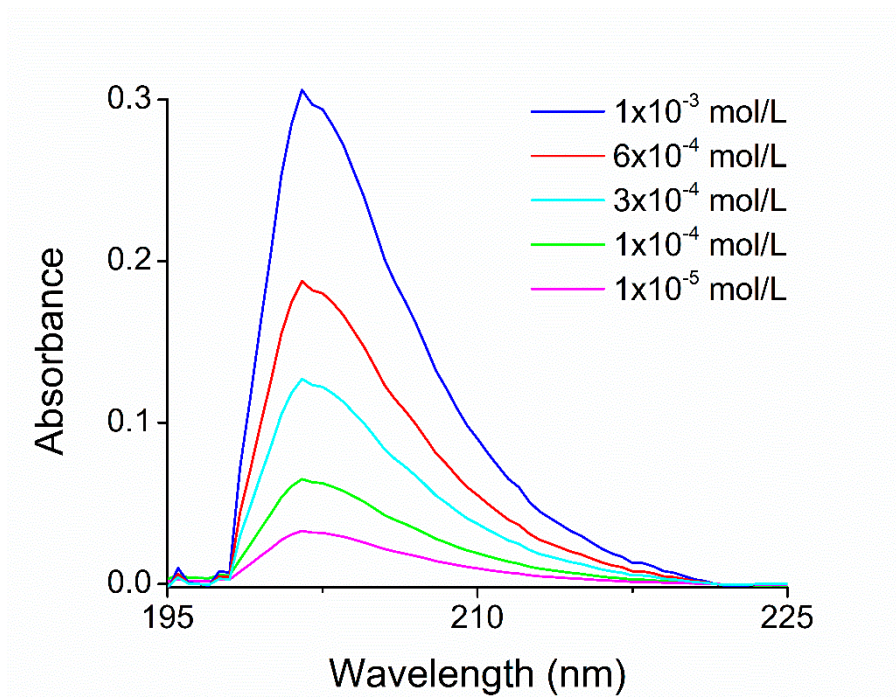

**Figure S21.** UV-absorption spectrum of amine derivative **14**

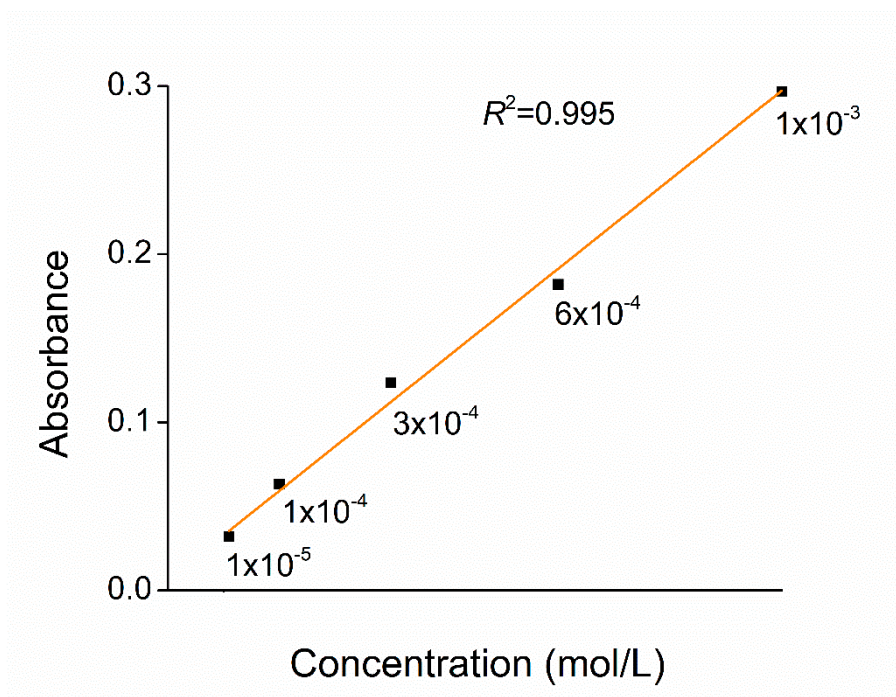

**Figure S22.** UV-absorption calibration curve for amine derivative **14** at the excitation wavelength of 202 nm

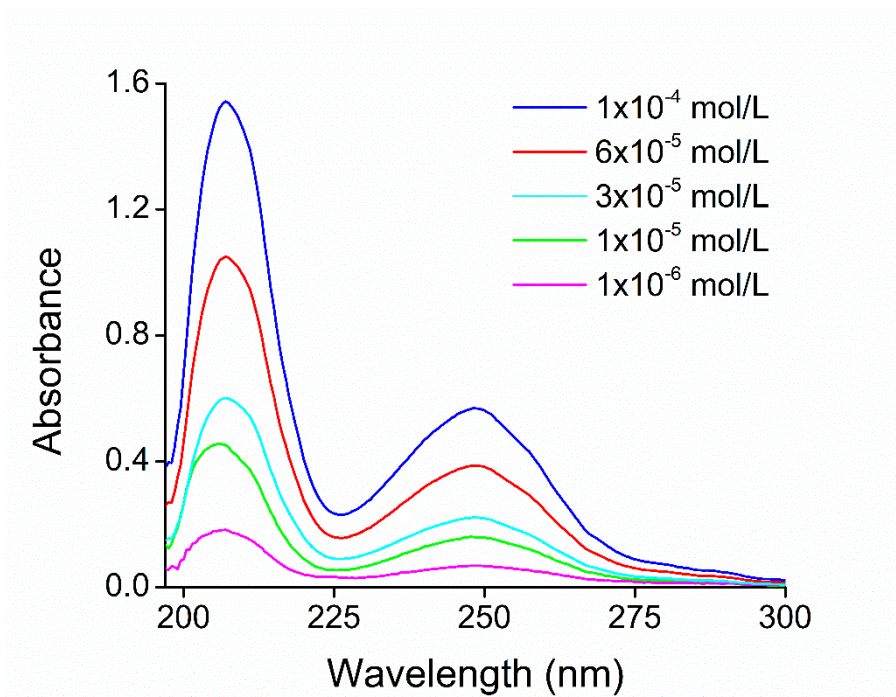

**Figure S23.** UV-absorption spectrum of amine derivative **15**

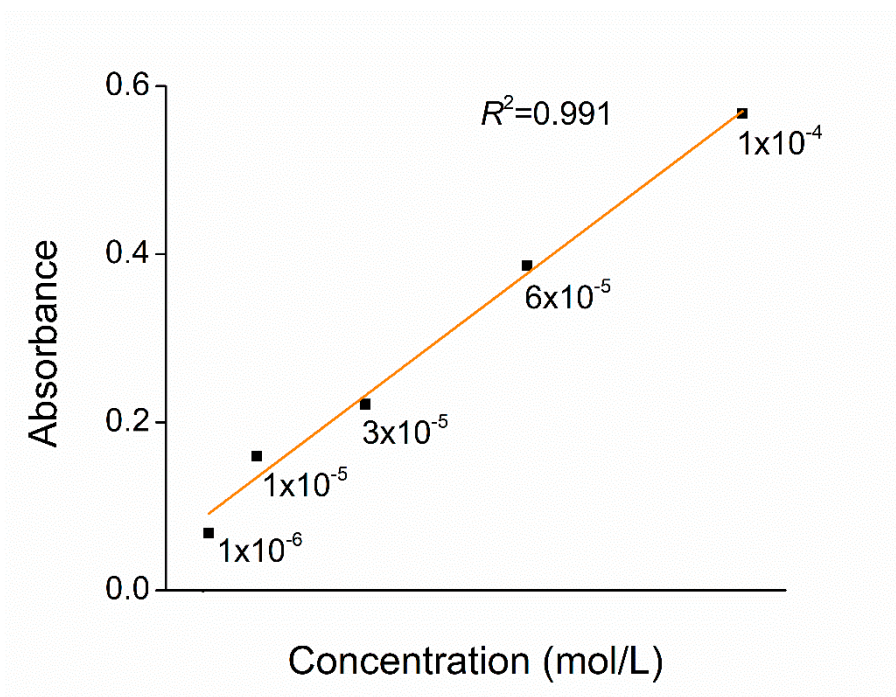

**Figure S24.** UV-absorption calibration curve for amine derivative **15** at the excitation wavelength of 248 nm

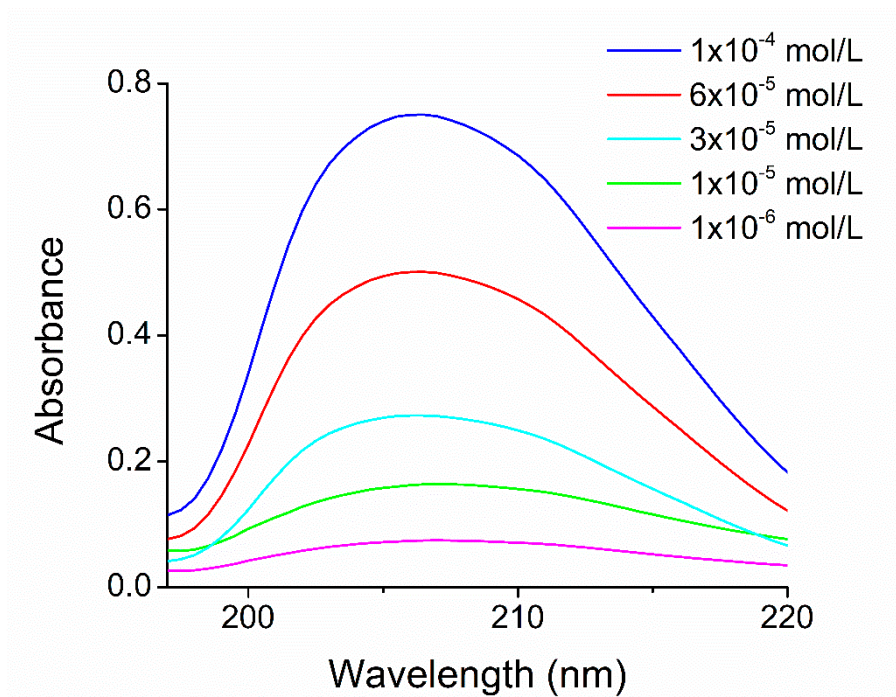

Figure S25. UV-absorption spectrum of amine derivative 16

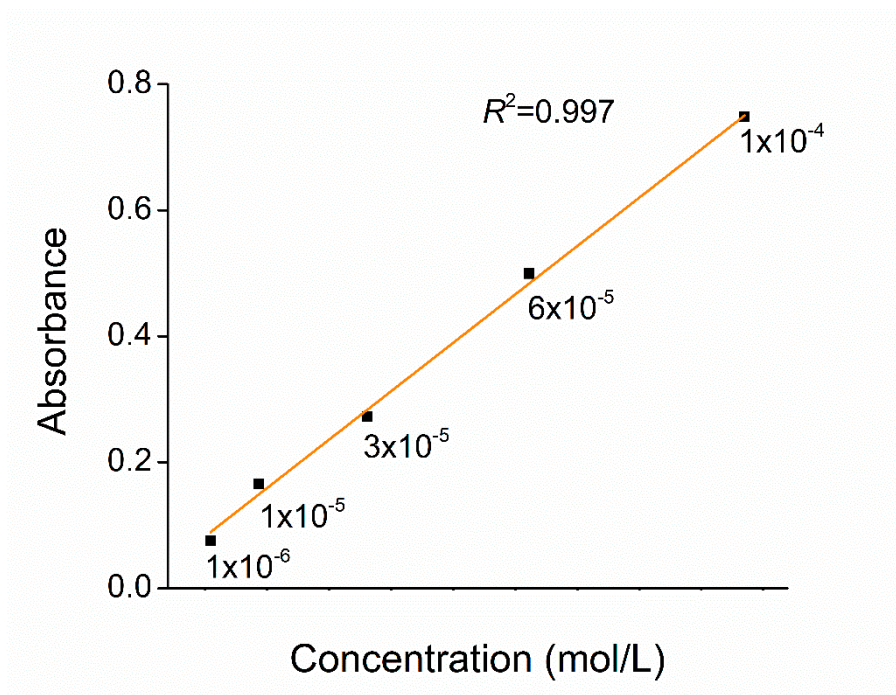

Figure S26. UV-absorption calibration curve for amine derivative 16 at the excitation wavelength of 207 nm



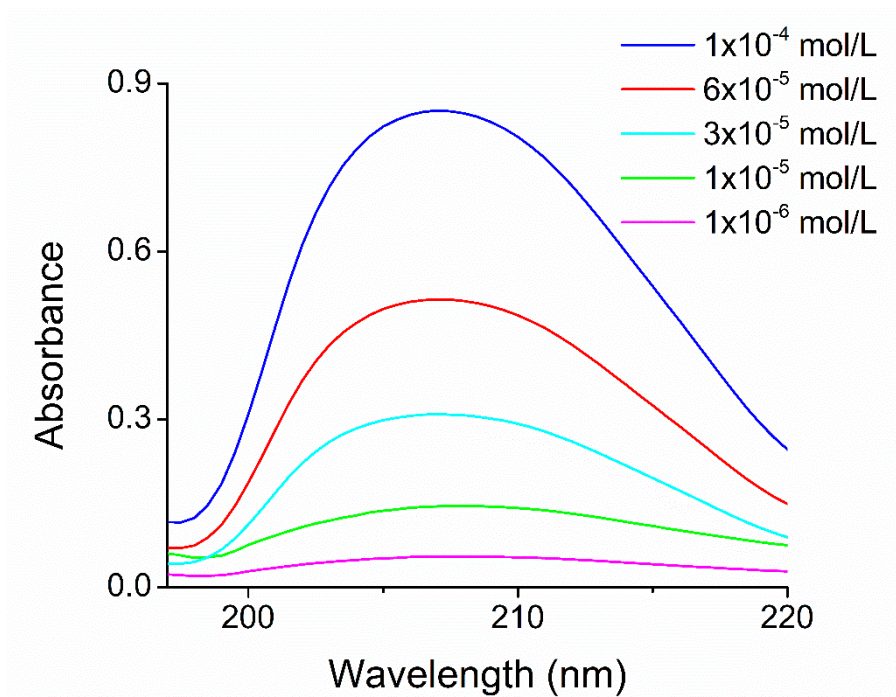

**Figure S27.** UV-absorption spectrum of amine derivative 17

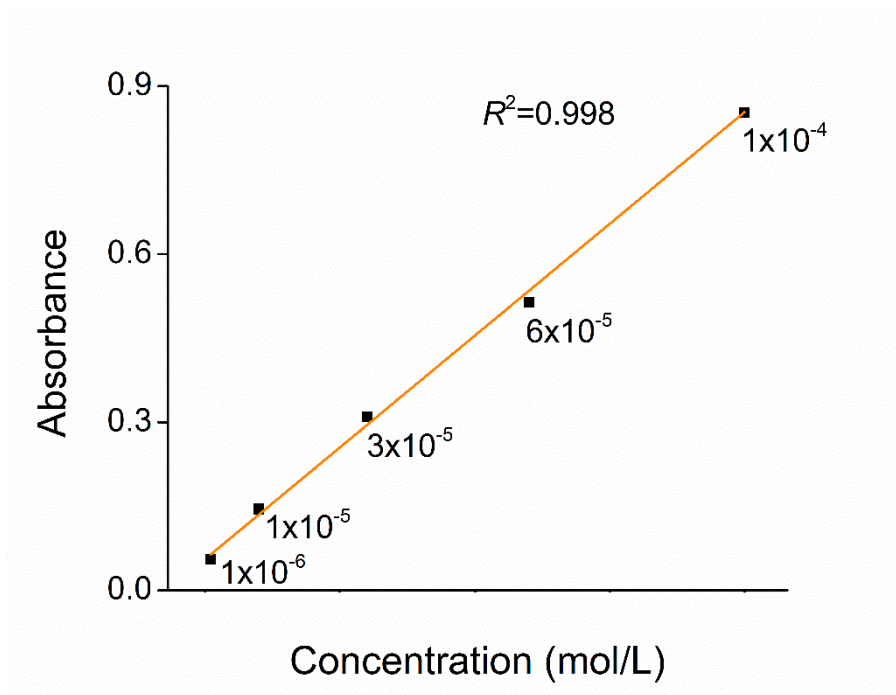

**Figure S28.** UV-absorption calibration curve for amine derivative 17 at the excitation wavelength of 207 nm



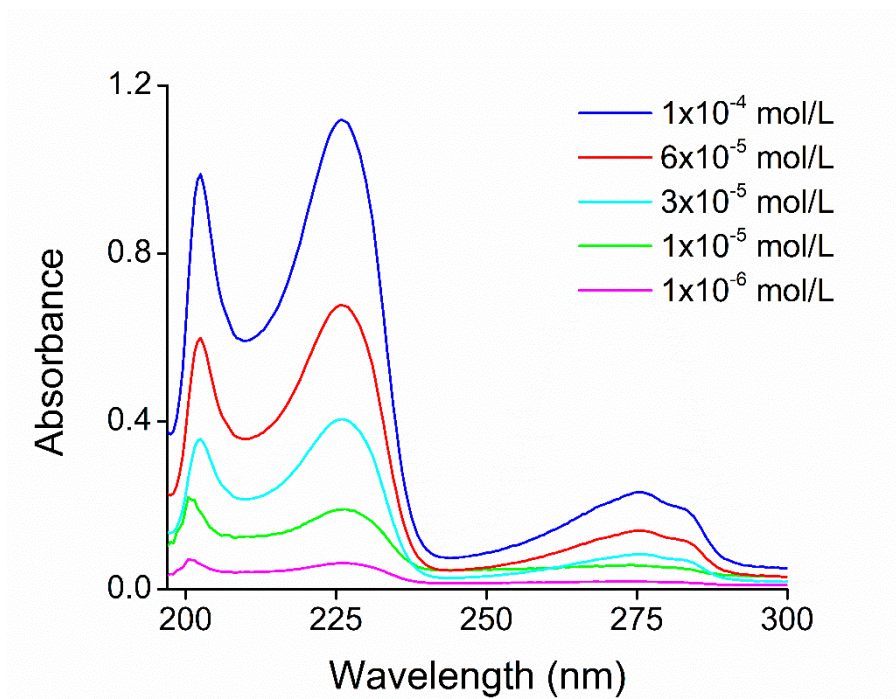

**Figure S29.** UV-absorption spectrum of amine derivative 18

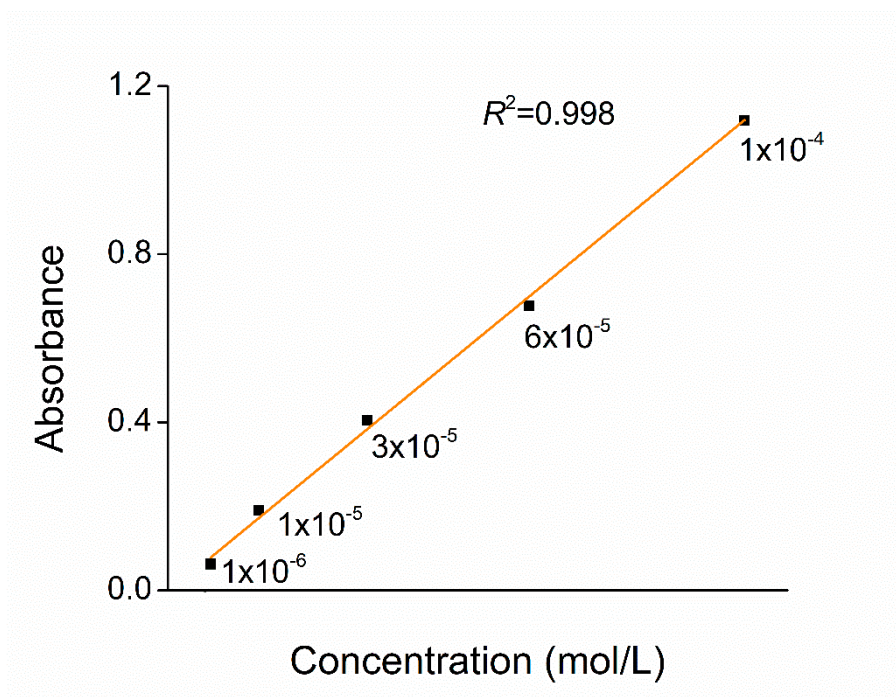

**Figure S30.** UV-absorption calibration curve for amine derivative 18 at the excitation wavelength of 226 nm

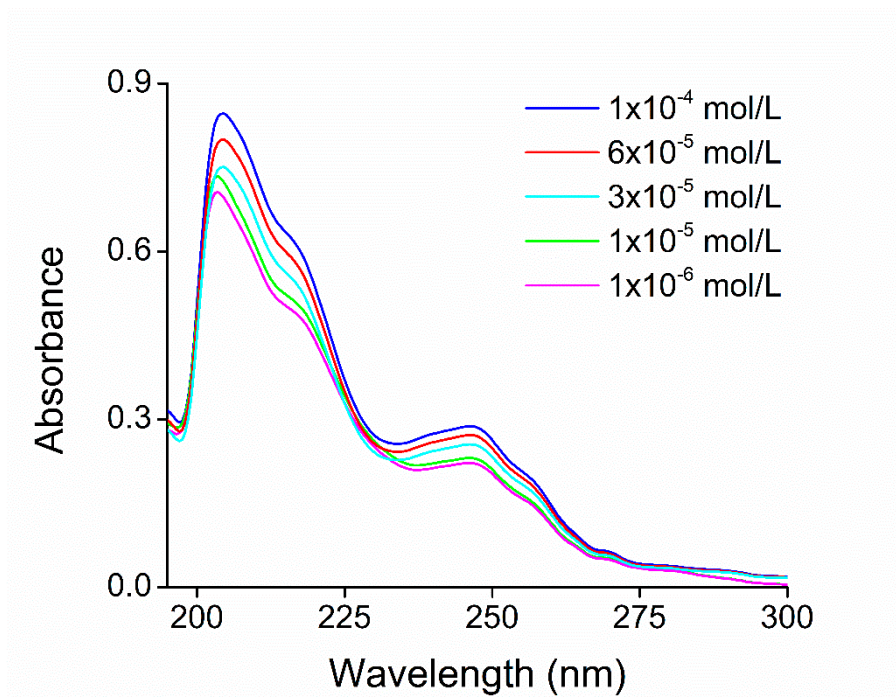

**Figure S31.** UV-absorption spectrum of amine derivative **19**

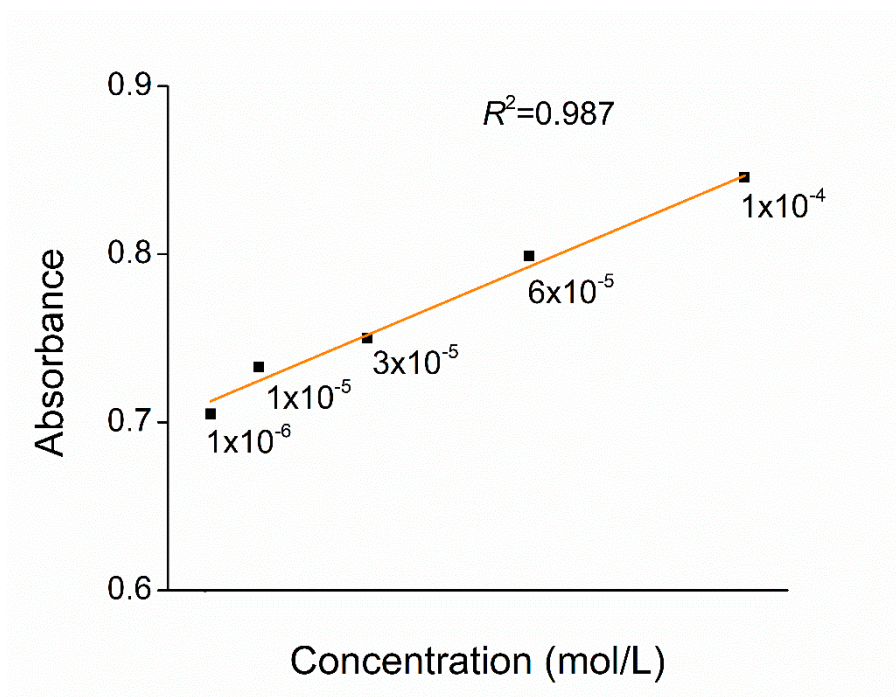

**Figure S32.** UV-absorption calibration curve for amine derivative **19** at the excitation wavelength of 204 nm

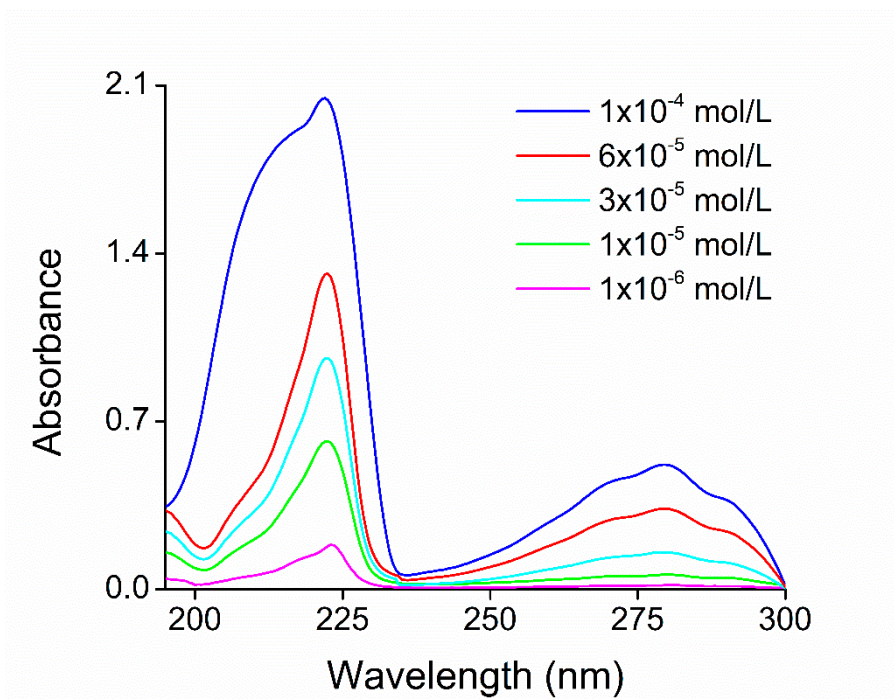

Figure S33. UV-absorption spectrum of amine derivative 20

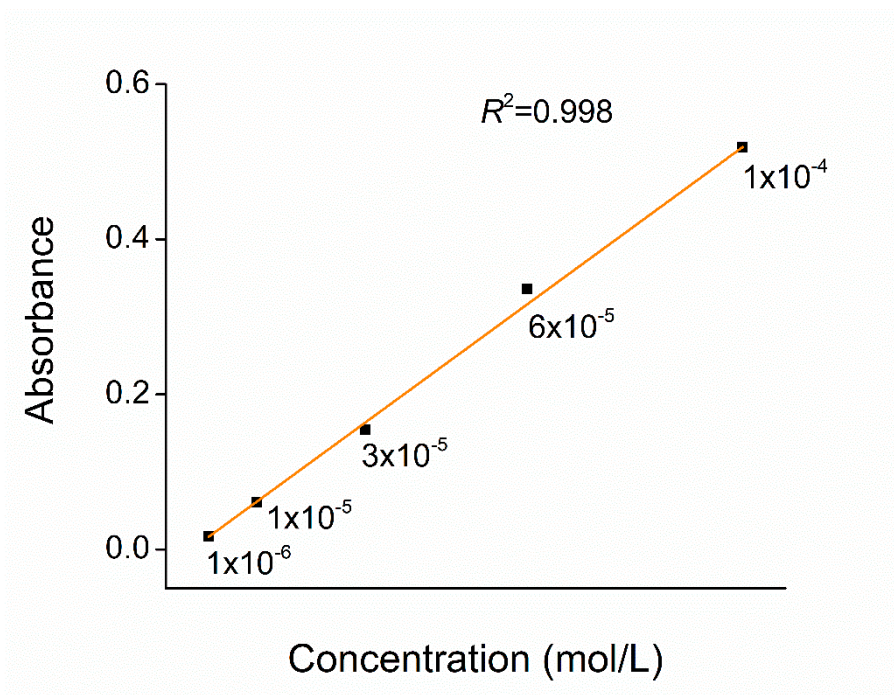

Figure S34. UV-absorption calibration curve for amine derivative 20 at the excitation wavelength of 280 nm



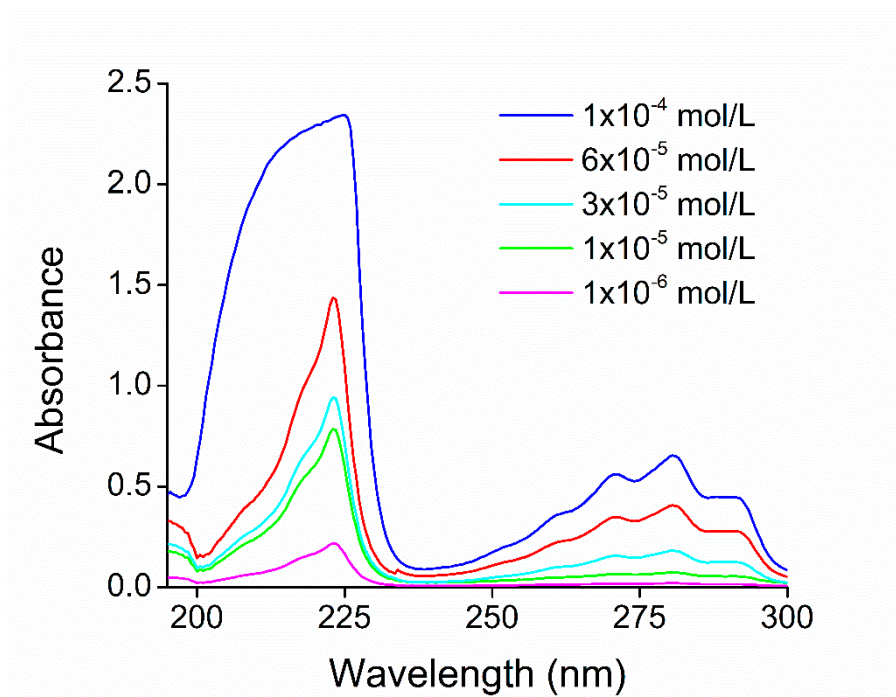

Figure S35. UV-absorption spectrum of amine derivative 21

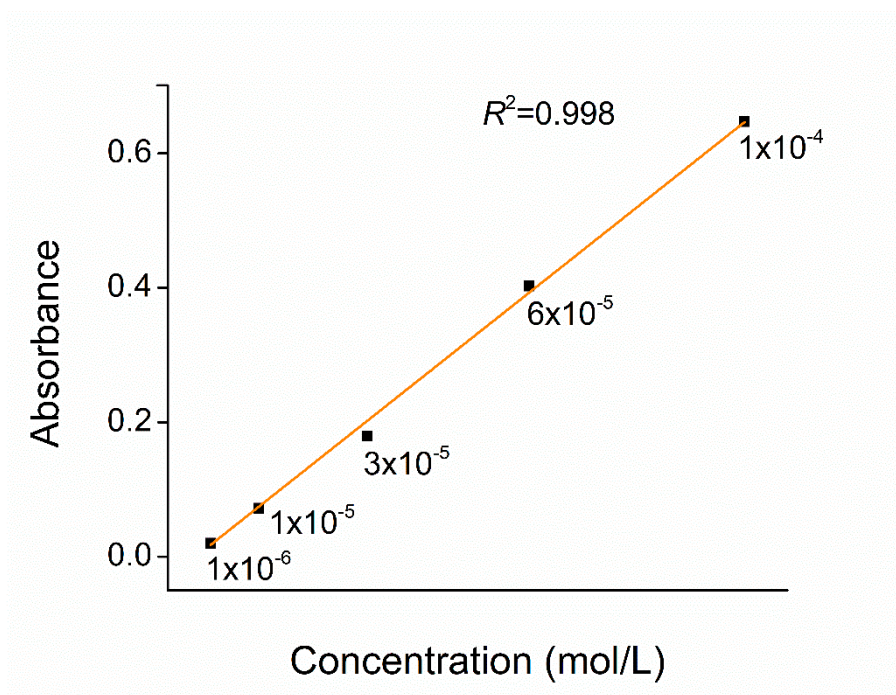

Figure S36. UV-absorption calibration curve for amine derivative 21 at the excitation wavelength of 280 nm

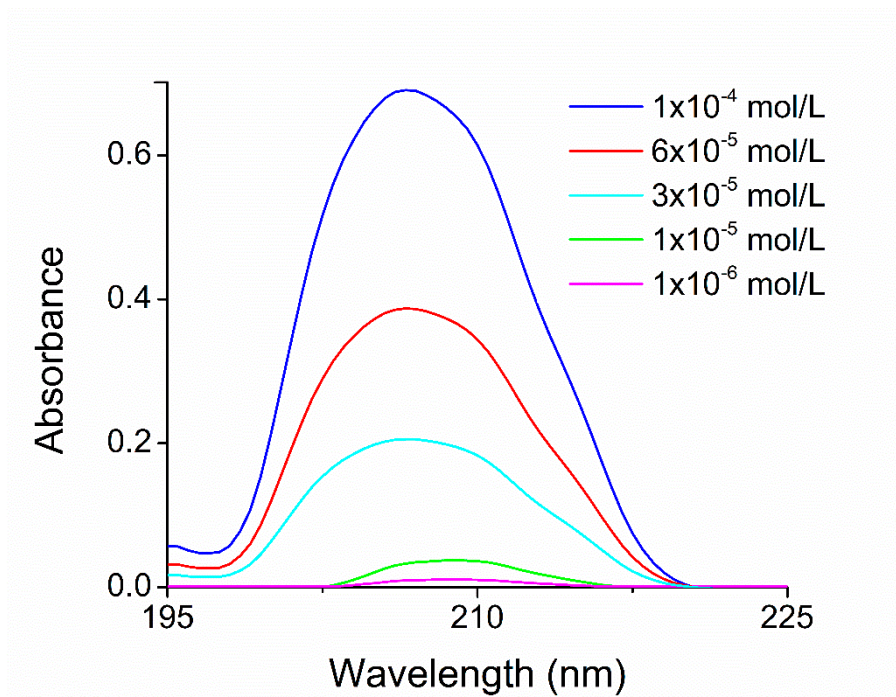

**Figure S37.** UV-absorption spectrum of amine derivative **22**

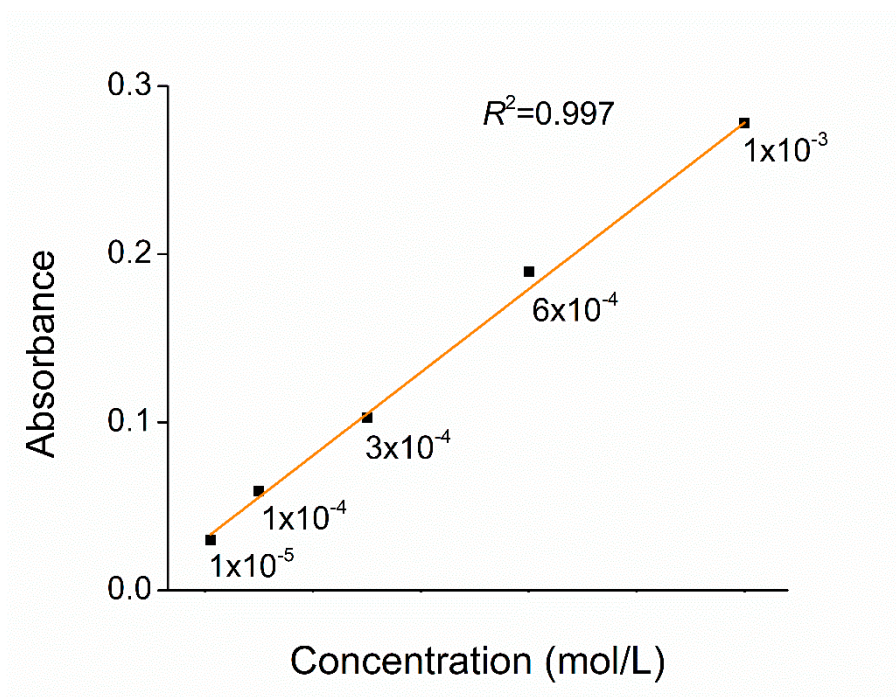

**Figure S38.** UV-absorption calibration curve for amine derivative **22** at the excitation wavelength of 207 nm

5. Spectrophotometric determination of complex stability constants ( $\log K$  values) of the reported enantiopure macrocycles (*R,R*)-2 and (*S,S*)-2 with the enantiomers of various chiral protonated amine derivatives

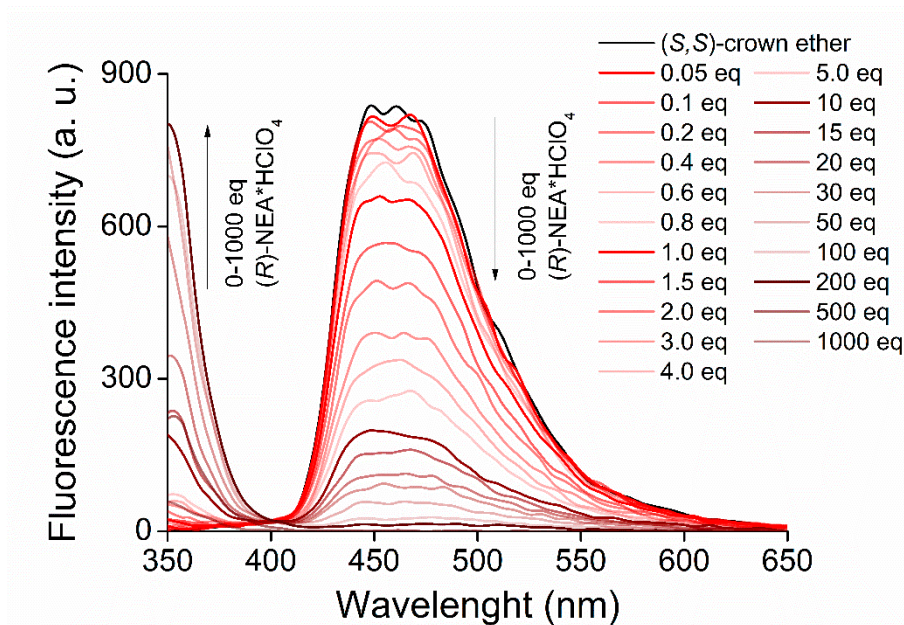

Figure S39. Fluorescence titration of macrocycle (*S,S*)-2 with (*R*)-NEA (21)\*HClO<sub>4</sub>

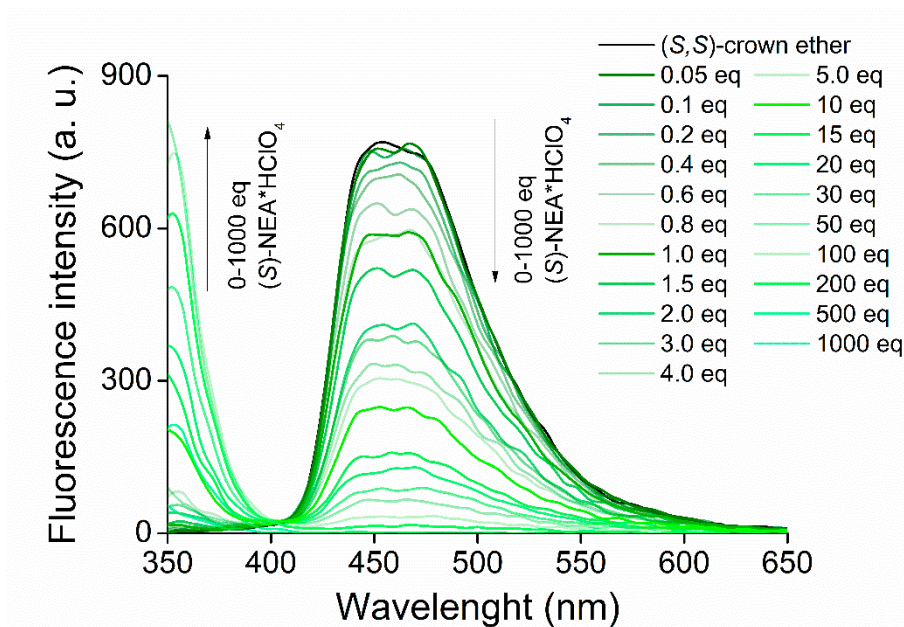

Figure S40. Fluorescence titration of macrocycle (*S,S*)-2 with (*S*)-NEA (21)\*HClO<sub>4</sub>



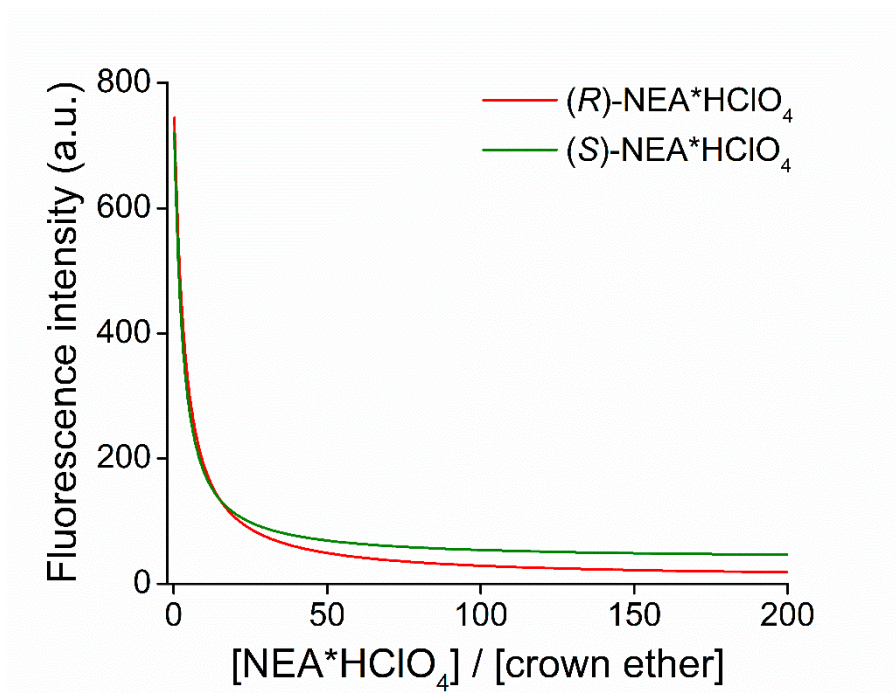

**Figure S41.** Fitted nonlinear functions for determining the stability constants of (*S,S*)-**2** with the enantiomers of NEA (**21**)\*HClO<sub>4</sub>

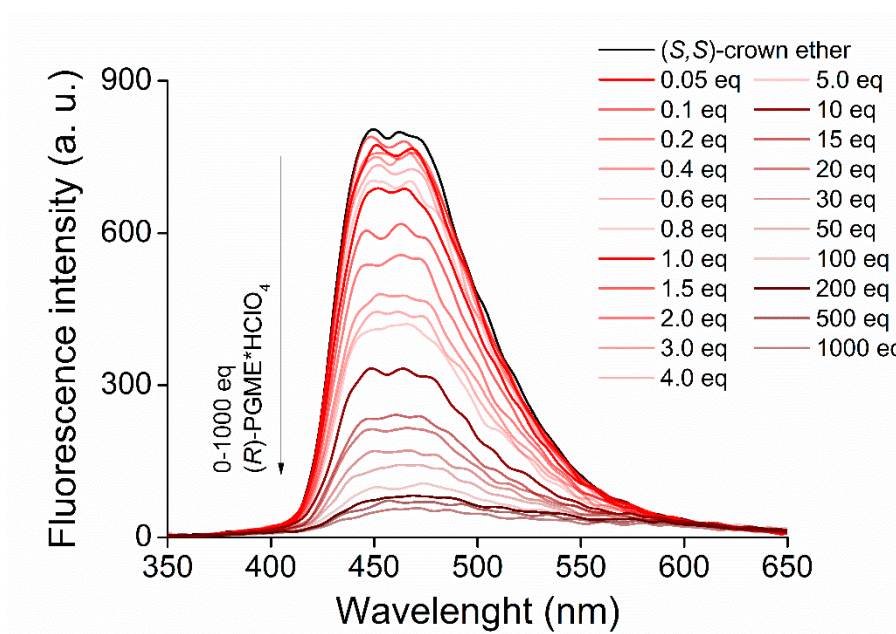

**Figure S42.** Fluorescence titration of macrocycle (*S,S*)-**2** with (*R*)-PGME (**23**)\*HClO<sub>4</sub>

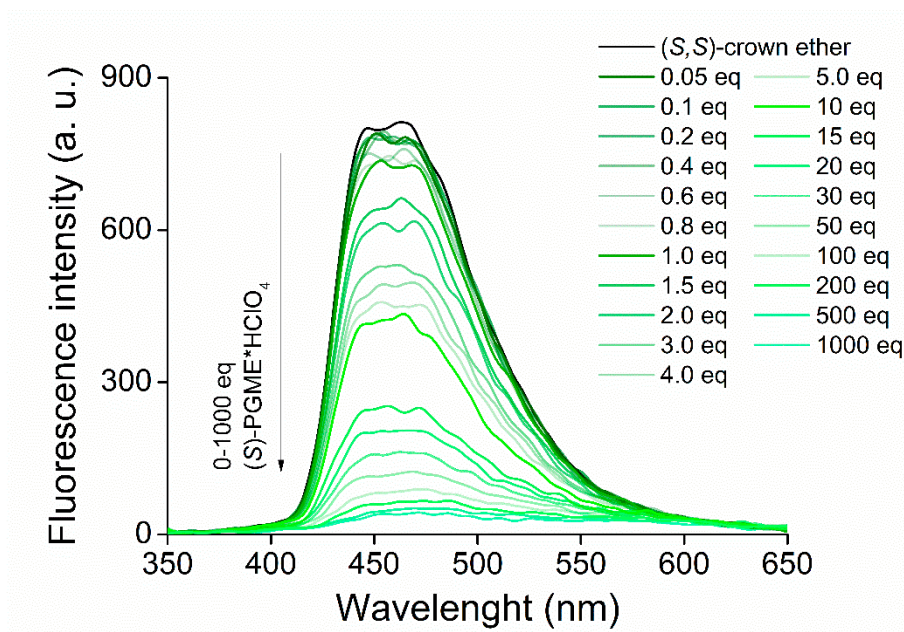

**Figure S43.** Fluorescence titration of macrocycle (*S,S*)-2 with (*S*)-PGME (23)\*HClO<sub>4</sub>

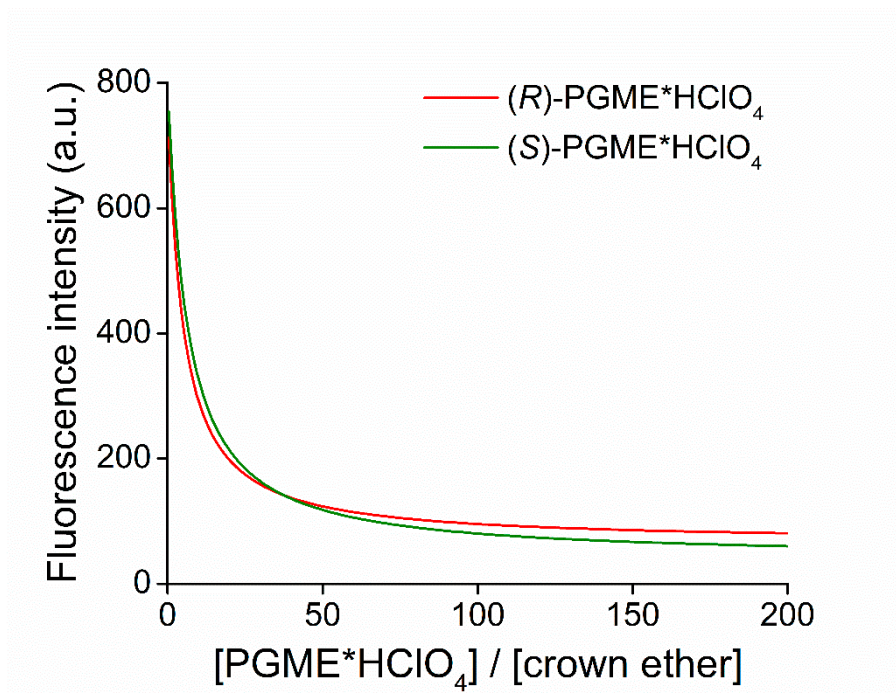

**Figure S44.** Fitted nonlinear functions for determining the stability constants of (*S,S*)-2 with the enantiomers of PGME (23)\*HClO<sub>4</sub>



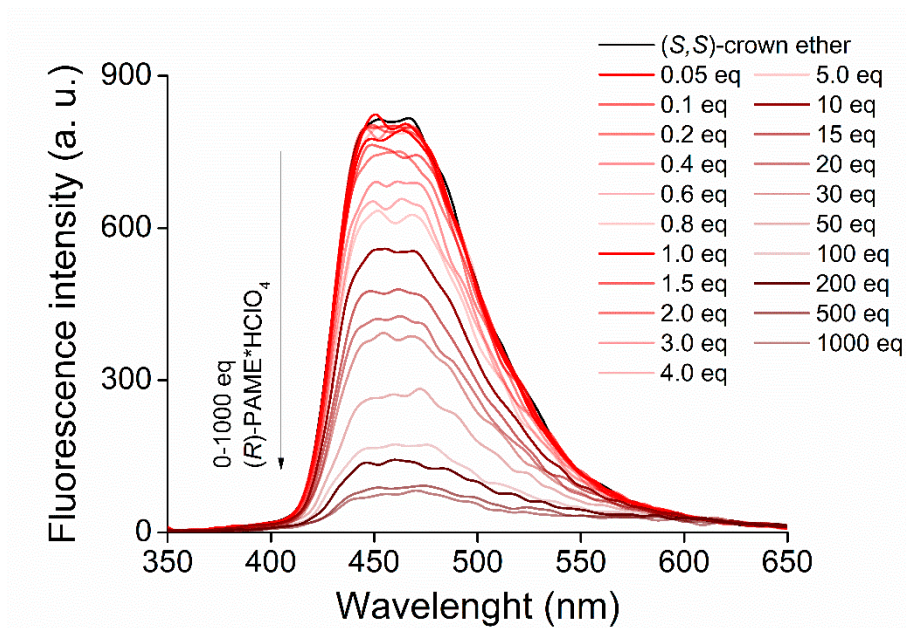

**Figure S45.** Fluorescence titration of macrocycle (*S,S*)-2 with (*R*)-PAME (24)\*HClO<sub>4</sub>

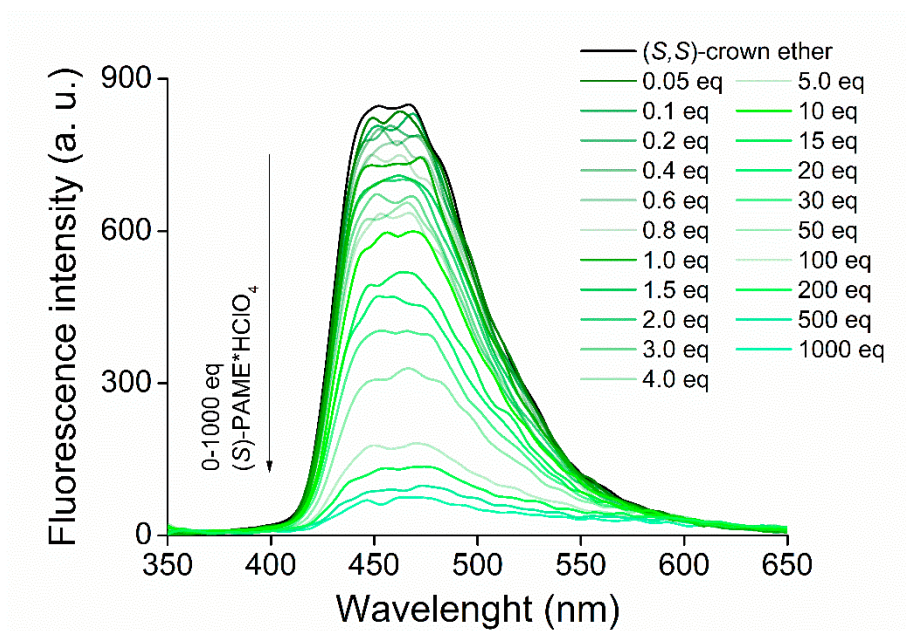

**Figure S46.** Fluorescence titration of macrocycle (*S,S*)-2 with (*S*)-PAME (24)\*HClO<sub>4</sub>

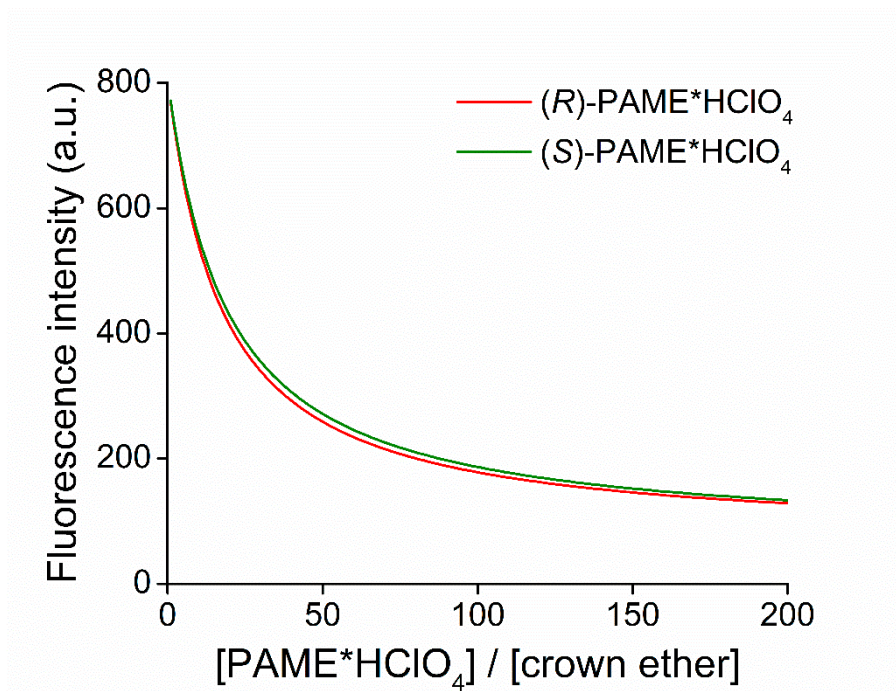

**Figure S47.** Fitted nonlinear functions for determining the stability constants of (*S,S*)-**2** with the enantiomers of PAME (**24**)\*HClO<sub>4</sub>

6. Electrochemical calibration curves and potentiometric selectivity measurements of ion-selective membrane electrode containing (R,R)-2 as an ionophore

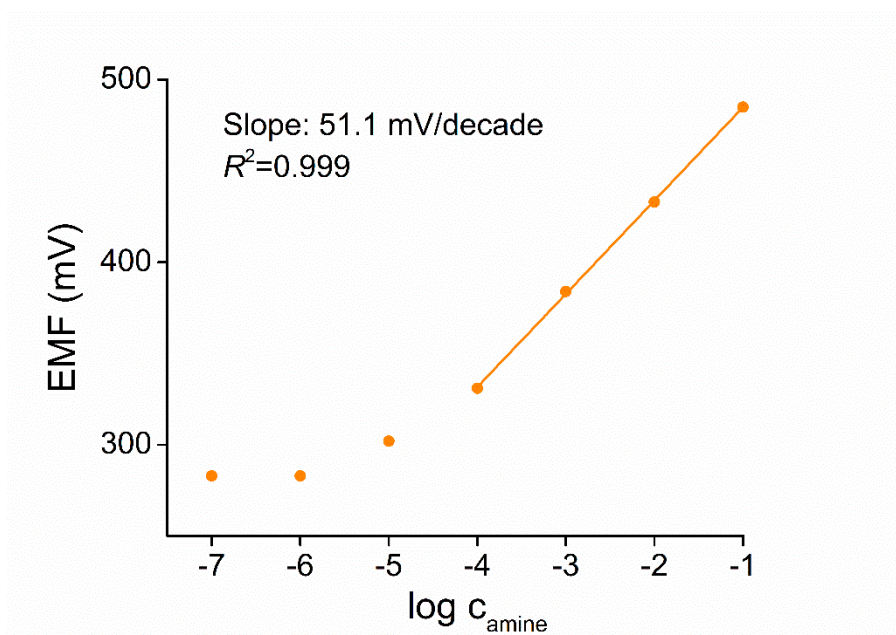

Figure S48. Calibration curve for racemic PEA (22)\*HCl

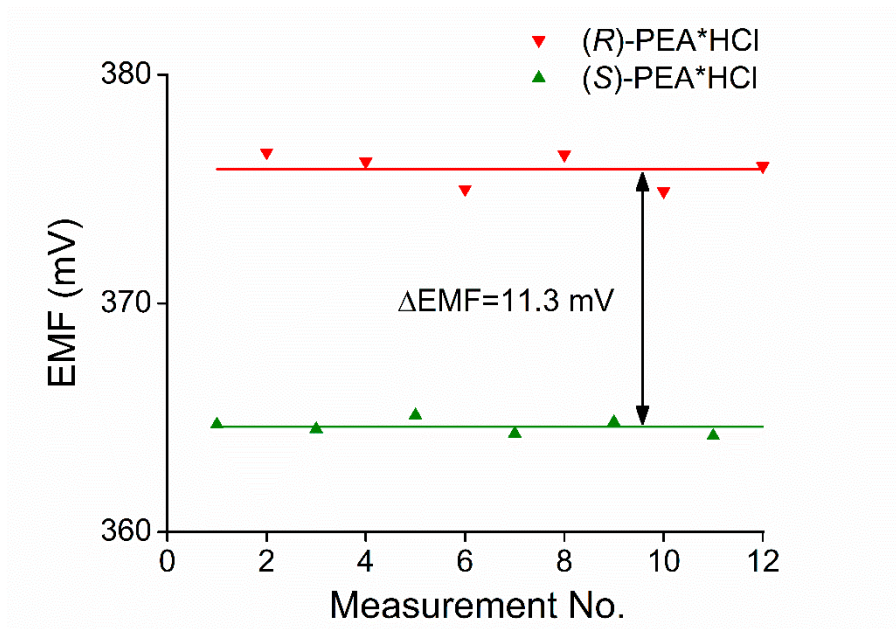

Figure S49. Measurements to determine potentiometric selectivity toward enantiomers of PEA (22)\*HCl

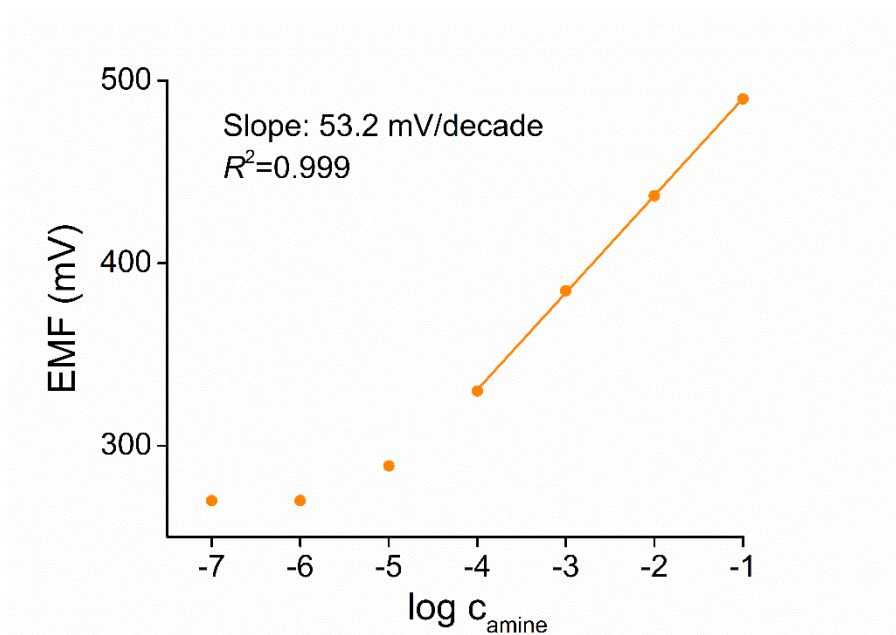

**Figure S50.** Calibration curve for racemic PGME (23)\*HCl

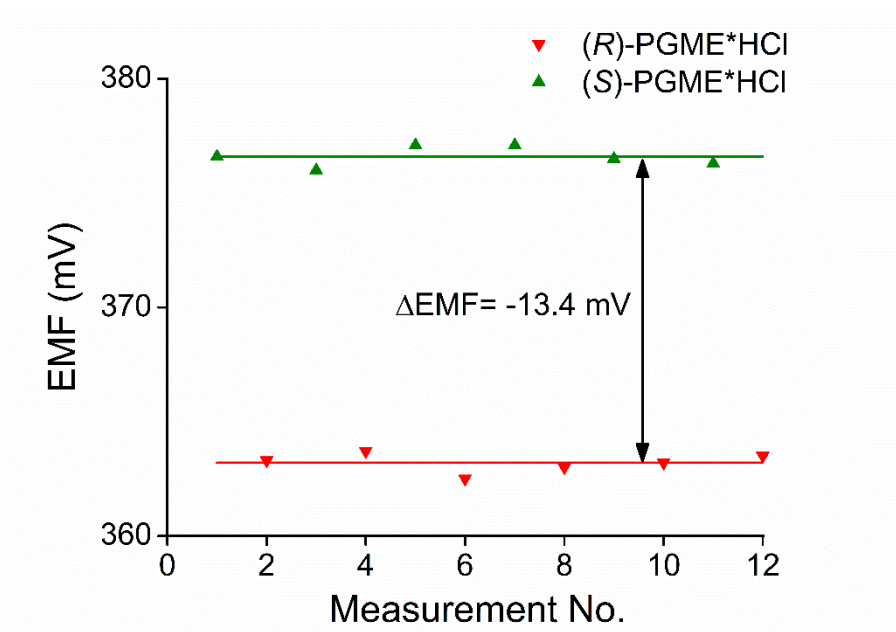

**Figure S51.** Measurements to determine potentiometric selectivity toward enantiomers of PGME (23)\*HCl



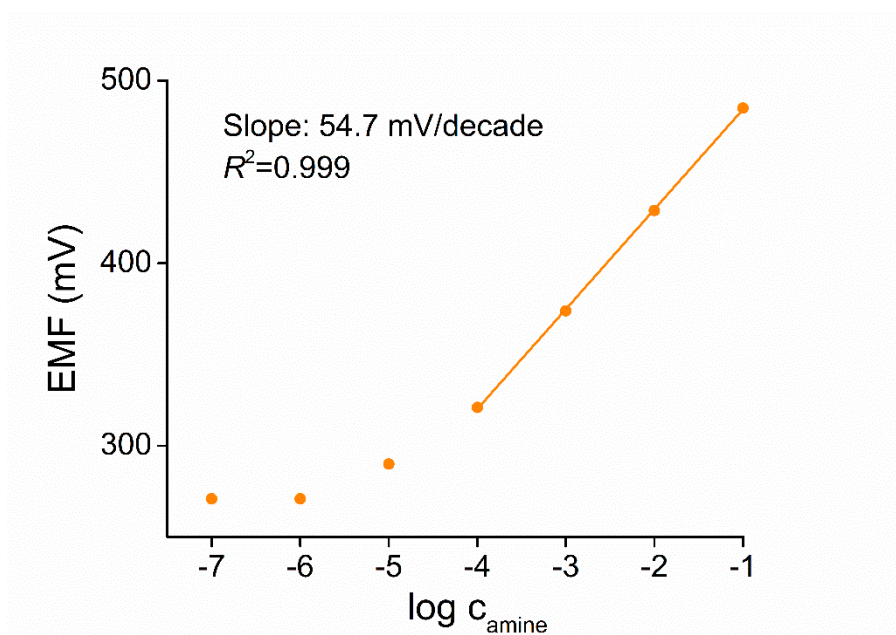

Figure S52. Calibration curve for racemic PAME (24)\*HCl

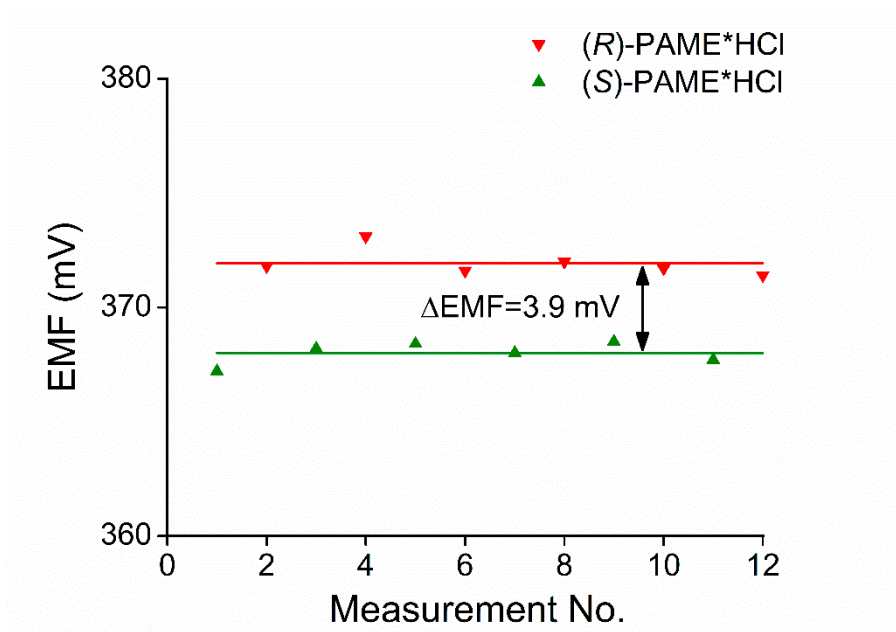

Figure S53. Measurements to determine potentiometric selectivity toward enantiomers of PAME (24)\*HCl
